# Supplementary material for: Encapsulation of Imazalil in HKUST-1 with Versatile Antimicrobial Activity
Source: MDPI journal article supplement (doi:10.3390/nano12213879), 2022-11-03
Supplement: s1 [file s1]

Supporting Information

# Encapsulation of Imazalil in HKUST-1 with Versatile Antimicrobial Activity

Hongqiang Dong <sup>2,†</sup>, Yuke He <sup>3,†</sup>, Chen Fan <sup>4</sup>, Zhongqiang Zhu <sup>2</sup>, Chunrong Zhang <sup>1</sup>, Xinju Liu <sup>1</sup>, Kun Qian <sup>3,\*</sup> and Tao Tang <sup>1,\*</sup>

<sup>1</sup> State Key Laboratory for Managing Biotic and Chemical Threats to the Quality and Safety of Agro-Products, Key Laboratory for Pesticide Residue Detection of Ministry of Agriculture and Rural Affairs, Institute of Agro-Product Safety and Nutrition, Zhejiang Academy of Agricultural Sciences, Hangzhou 310021, China

<sup>2</sup> College of Agriculture, Tarim University, Alaer 843300, China

<sup>3</sup> College of Plant Protection, Southwest University, Chongqing 400716, China

<sup>4</sup> Beijing Higher Institution Engineering Research Center of Food Additives and Ingredients, Beijing Technology and Business University, Beijing 100048, China

\* Correspondence: qiankun1982@163.com (K.Q.); tangtao@zaas.ac.cn (T.T.); Tel./Fax: +86-571-86401292 (T.T.)

† These authors contributed equally to this work.

*Pseudomonas syringae* pv. *lachrymans*

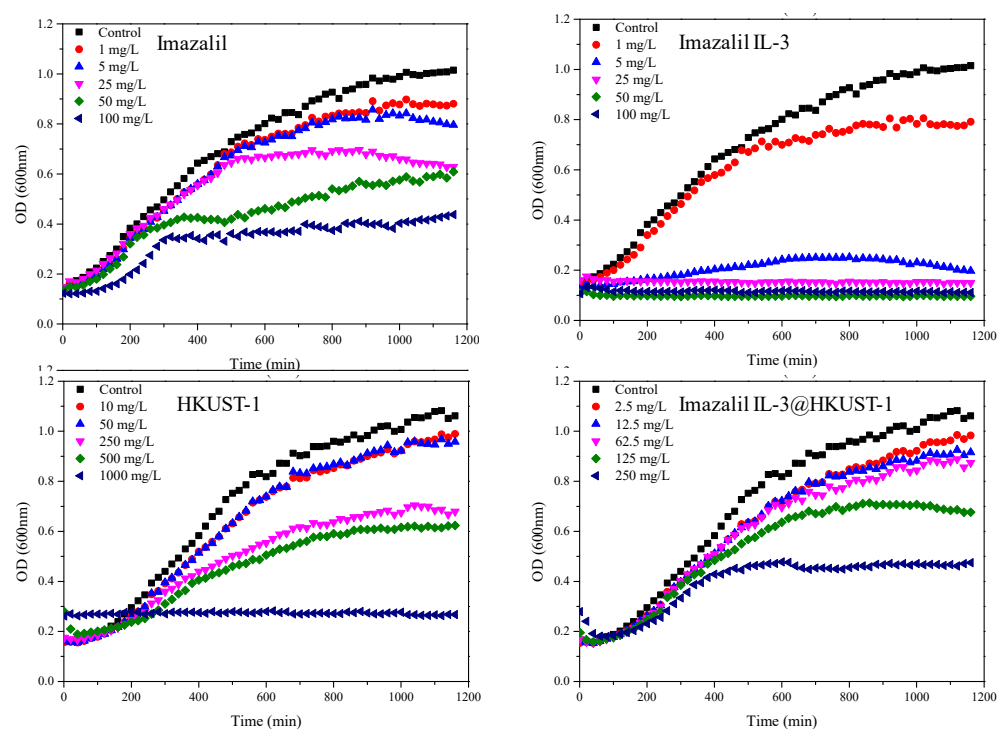

*Xanthomonas campestris* pv. *campestris*

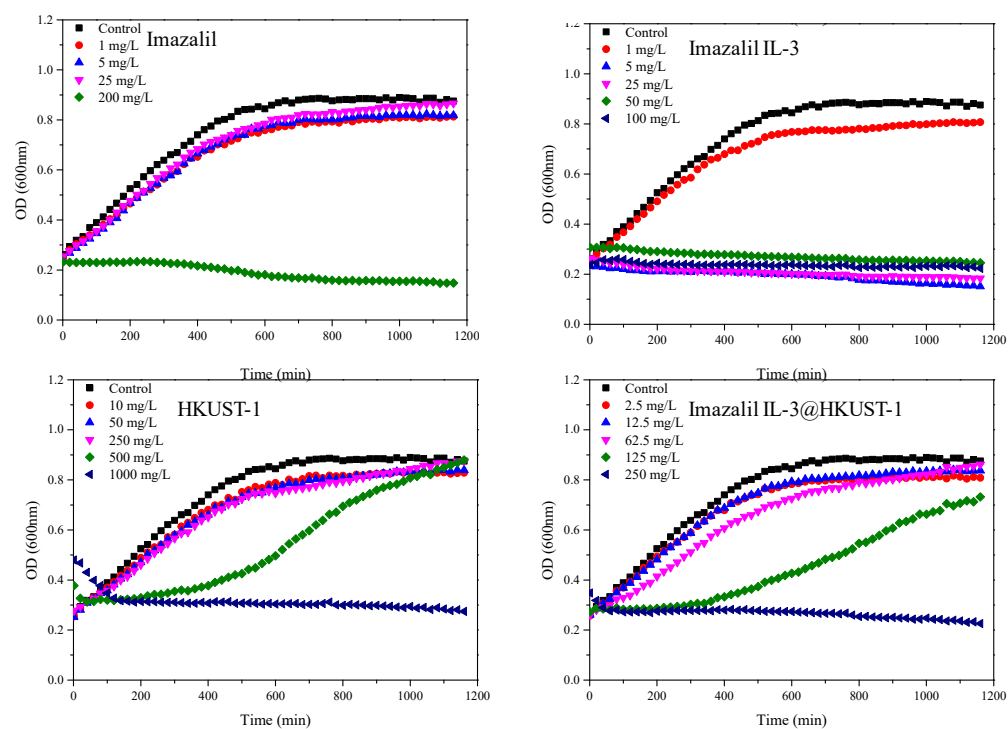

**Figure S1.** Antibacterial testing of imazalil, imazalil IL-3, HKUST-1 and imazalil IL-3@HKUST-1 evaluated with *Pseudomonas syringae* pv. *lachrymans* and *Xanthomonas campestris* pv. *campestris*.

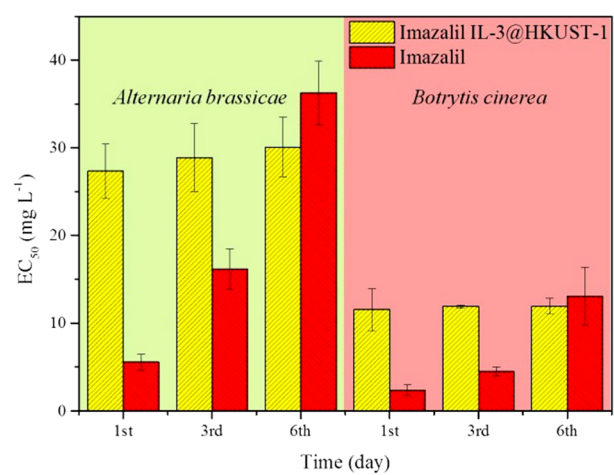

**Figure S2.** The activities of test compounds against *Alternaria brassicae* and *Botrytis cinerea* at different time.
